# Supplementary material
Source: publisher site journal article supplement (https://static.cambridge.org/content/id/urn:cambridge.org:id:article:S0043174519000213/resource/name/S0043174519000213supp001.docx)

**Supplemental Information**

**Figure S1. Strategy Composition.** The table below shows which specific practices comprise each strategy. The “Your Strategy” column was not representative of all participants’ responses. Note that Seedbank Elimination is separated into the first through fourth years (short) and the fifth year and beyond (long).


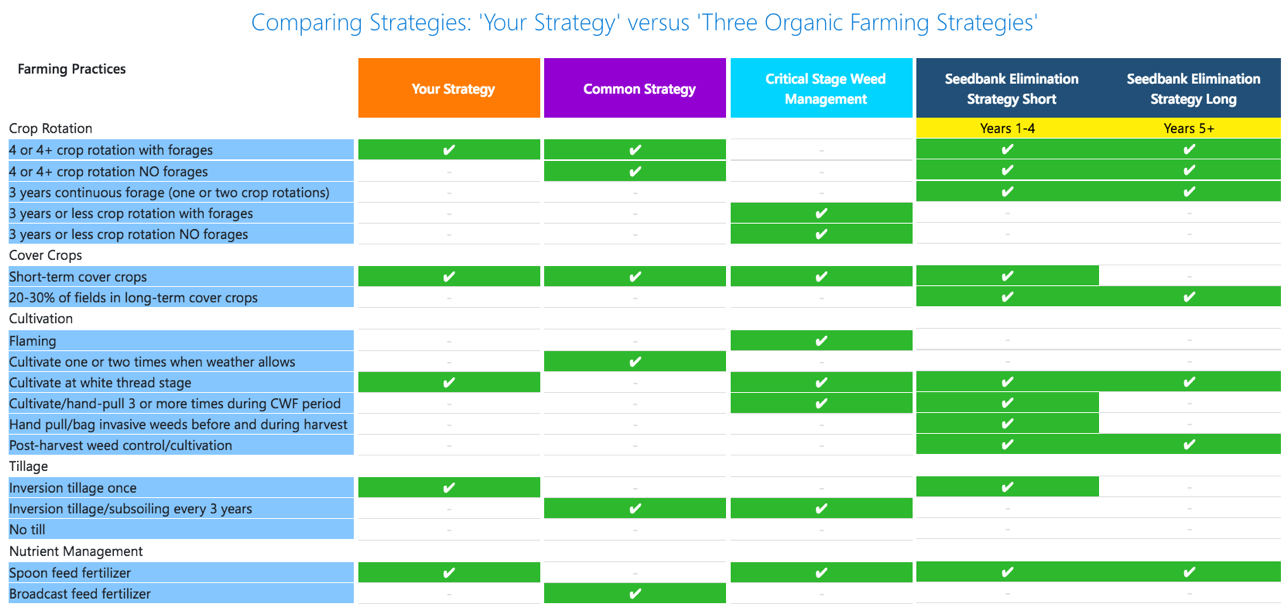

Supplement: Supplementary file 1 [file S0043174519000213supp001.docx]
